# Supplementary material for: Antisense transcription‐dependent chromatin signature modulates sense transcript dynamics
Source: PubMed Central journal article supplement (PMC5810148; doi:10.15252/msb.20178007), 2018-02-12
Supplement: MSB-14-e8007-s001.pdf [file MSB-14-e8007-s001.pdf]

**Appendix: Antisense transcription-dependent chromatin signature modulates sense transcript dynamics**

**Thomas Brown\*, Françoise S. Howe\*, Struan C. Murray\*, Meredith Wouters, Philipp Lorenz, Emily Seward, Scott Rata, Andrew Angel<sup>§</sup> and Jane Mellor<sup>§</sup>**  
**Department of Biochemistry, South Parks Road, Oxford, OX1 3QU, UK.**

**Contents:**

**Appendix Figure S1**

**Supplementary Tables**

**Appendix Table S1. Primer sequences used for qPCR.**

**Appendix Table S2. Primer sequences used to generate the strand-specific Northern blotting probes**

**Appendix Table S3. Sequences of the *GAL1* sense RNA-FISH probes**

**Appendix Table S4. Reagents**

**Appendix Table S5. Software and Algorithms**

**Appendix Table S6. Organisms/Strains**

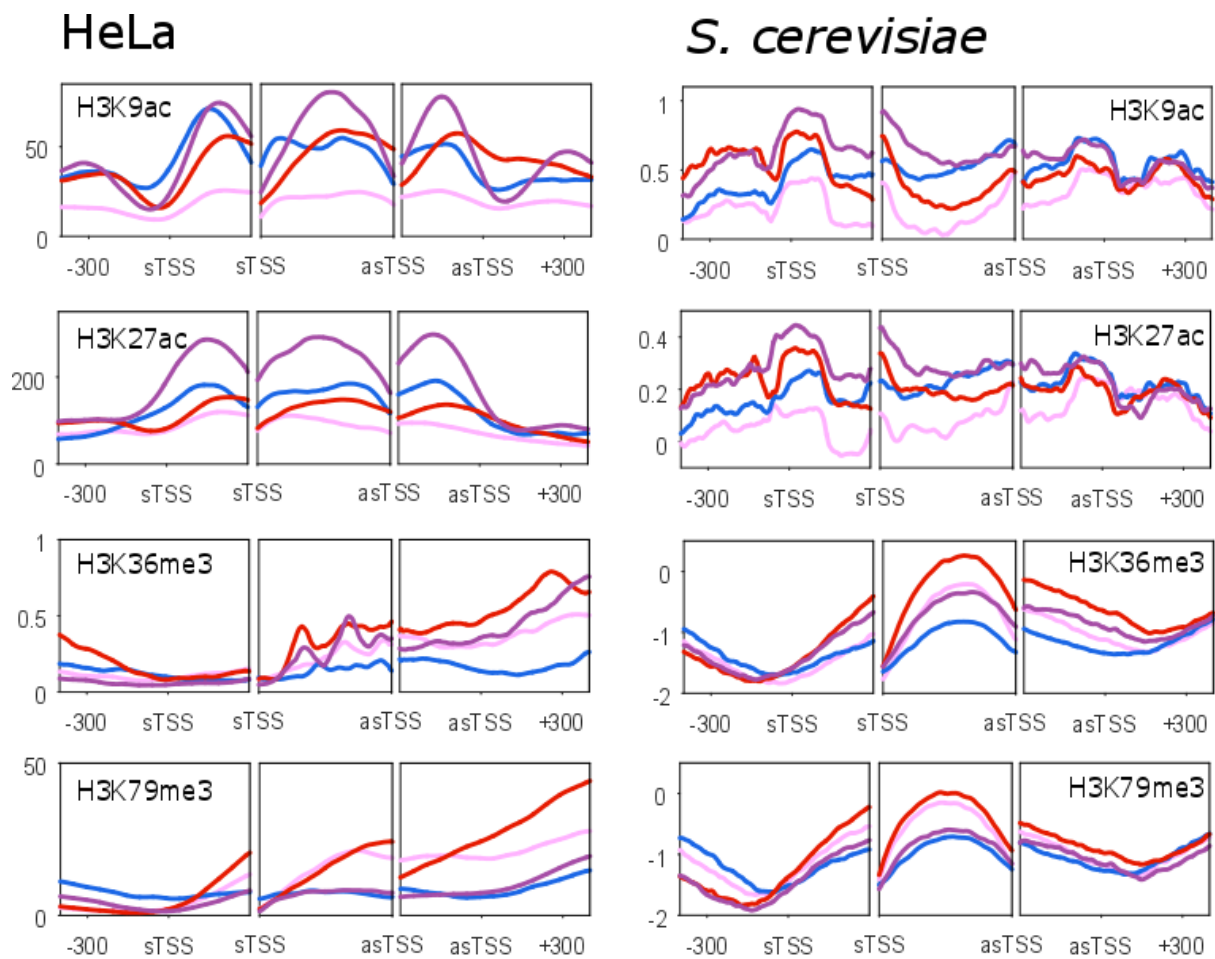

low sense, low antisense (n = 192)  
 low sense, high antisense (n = 149)  
 high sense, low antisense (n = 140)  
 high sense, high antisense (n = 198)

### Appendix Figure S1

Levels of histone acetylation and trimethylation in gene classes with varying levels of antisense transcription, in both HeLa and *S. cerevisiae*. Shown are average levels in four different gene classes as shown at bottom of figure. In all cases, *low* was any level of sense/antisense transcription (measured by NET-seq) beneath the 30<sup>th</sup> percentile for all genes, and *high* was any level above the 70<sup>th</sup> percentile. For each modification in each species, the three panels are the same format as shown in fig 2B.

## Supplementary Tables

**Appendix Table S1. Primer sequences used for qPCR.**

| Primer Name      | Sequence (5'-3')         |
|------------------|--------------------------|
| <i>GAL1</i> -2 F | CCGGTCGCGTTCCTGAAACG     |
| <i>GAL1</i> -2 R | GCCAGGTTACTGCCAATTTT     |
| <i>GAL1</i> -1 F | TGGAAAAGCTGCATAACCACT    |
| <i>GAL1</i> -1 R | GCGCTAGAATTGAACTCAGGT    |
| <i>GAL1</i> 1 F  | CGCTTATGATGCTAAACCGG     |
| <i>GAL1</i> 1 R  | CGCAAAGCATATCAAATCA      |
| <i>GAL1</i> 2 F  | CCGTCAAAGTTTTGAACGAGA    |
| <i>GAL1</i> 2 R  | CAGAAGGATCAATTGTGACATAAG |

**Appendix Table S2. Primer sequences used to generate the strand-specific Northern blotting probes**

| Primer Name   | Sequence (5'-3')     |
|---------------|----------------------|
| <i>GAL1</i> F | TGTGTCGGACTGGTCTAATT |
| <i>GAL1</i> R | GATCCATACCGCCATTGTTA |

**Appendix Table S3. Sequences of the *GAL1* sense RNA-FISH probes**

Underlined nucleotides were ordered as amino-allyl-dTs for subsequent labelling with Cy3 fluorescent dye.

| Probe Name                | Sequence (5'-3')                                                                                  |
|---------------------------|---------------------------------------------------------------------------------------------------|
| <i>GAL1</i> Sense probe 1 | <u>T</u> <u>I</u> ATGCTCGGGCAC <u>I</u> TTTCGGCCAAT <u>I</u> GG<br>TCTTGGTAA <u>I</u> TCCTTTGCGCT |
| <i>GAL1</i> Sense probe 2 | AGGA <u>I</u> CAATTGTGACATAAGAACCG <u>I</u> CC<br>AACGGCAA <u>I</u> CGAACTTCC <u>I</u> T          |
| <i>GAL1</i> Sense probe 3 | <u>I</u> ACATCACCC <u>I</u> CACAGAAGACT <u>I</u> GCAGC<br>CCGGCCAGAGGAGCAC <u>I</u> GGCAA         |
| <i>GAL1</i> Sense probe 4 | <u>I</u> CCAGGGCCCATAT <u>I</u> TCGCTTTAACAACA<br>GCTAAAGCAACGGCACAA <u>I</u> TG                  |
| S65T pFA6a-GFP probe 1    | CCTCTTCTTGAAAAGTGACC                                                                              |
| S65T pFA6a-GFP probe 2    | ATCTACCACTACAATTACCC                                                                              |

|                         |                       |
|-------------------------|-----------------------|
| S65T pFA6a-GFP probe 3  | TAAAAGACAGTCACCTCTCC  |
| S65T pFA6a-GFP probe 4  | CGTTGTATGCCTTTTGAATG  |
| S65T pFA6a-GFP probe 5  | AACGTGATGACCTTTTGATG  |
| S65T pFA6a-GFP probe 6  | CAAGGTACCGGTTGTGAACA  |
| S65T pFA6a-GFP probe 7  | AGTGAATACCACAAGTTACG  |
| S65T pFA6a-GFP probe 8  | CTAGTATACTTTGCCGTA    |
| S65T pFA6a-GFP probe 9  | AAAAGTTCTCACGGTACGGG  |
| S65T pFA6a-GFP probe 10 | TCCAATACATGTCCTTTCTT  |
| S65T pFA6a-GFP probe 11 | AAAAGTTTCTACTGCCCTTG  |
| S65T pFA6a-GFP probe 12 | GTTCTGTGCACGACCTCAGT  |
| S65T PFA6A-GFP probe 13 | ACTTCCACTATGGGAACAAT  |
| S65T PFA6A-GFP probe 14 | TCTTAGCTCAATTTTCCATA  |
| S65T pFA6a-GFP probe 15 | TACCTTTGTAAGAACCTGTG  |
| S65T pFA6a-GFP probe 16 | CCTTATGTTGATATTGAGTG  |
| S65T pFA6a-GFP probe 17 | TACATATGTAGTACCGTCTG  |
| S65T pFA6a-GFP probe 18 | TGTTTTCTTACCTTAGTTTC  |
| S65T pFA6a-GFP probe 19 | TCTGTGTTGTAACCTTCTACC |
| S65T pFA6a-GFP probe 20 | CGCAAGTTGATCGTCTGGTA  |
| S65T pFA6a-GFP probe 21 | TGTTTTATGAGGTTAACCGC  |
| S65T pFA6a-GFP probe 22 | CGGGACAGGAAAATGGTCTG  |
| S65T pFA6a-GFP probe 23 | ACAGGTGTGTTAGACGGGAA  |
| S65T pFA6a-GFP probe 24 | CTTTCTAGGGTTGCTTTTCT  |
| S65T pFA6a-GFP probe 25 | CTGGTGTACCAGGAAGAACT  |
| S65T pFA6a-GFP probe 26 | AACATTGTCGACGACCCTAA  |
| S65T pFA6a-GFP probe 27 | GTACCGTACCTACTTGATAT  |

**Appendix Table S4. Reagents**

| REAGENT or RESOURCE | SOURCE    | IDENTIFIER                    |
|---------------------|-----------|-------------------------------|
| <b>Antibodies</b>   |           |                               |
| Pan-H3 C terminus   | Millipore | Cat# 07-690<br>RRID:AB_417398 |

|                                                      |               |                                 |
|------------------------------------------------------|---------------|---------------------------------|
| H3K4me2                                              | Millipore     | Cat# 07-030<br>RRID:AB_11213050 |
| H3K4me3                                              | Millipore     | Cat# 05-745R<br>RRID:AB_1587134 |
| H3K9ac                                               | Millipore     | Cat# 07-352<br>RRID:AB_310544   |
| <b>Chemicals, Peptides, and Recombinant Proteins</b> |               |                                 |
| SYBR green qPCR master mix                           | Bioline       | Cat# QT605-20                   |
| CyDye™ Cy3                                           | GE Healthcare | Cat# PA23001                    |
| Protein A Sepharose CL4B beads                       | VWR           | Cat# 17-0780-01                 |
| <b>Critical Commercial Assays</b>                    |               |                                 |
| QIAquick PCR Purification Kit                        | Qiagen        | Cat# 28106                      |
| QIAquick Nucleotide Removal Kit                      | Qiagen        | Cat# 28304                      |
| <b>Oligonucleotides</b>                              |               |                                 |
| For Northern blotting probe primers see Table S2     |               |                                 |
| For qPCR primers see Table S1                        |               |                                 |
| For RNA FISH probes see Table S3                     |               |                                 |

**Appendix Table S5. Software and Algorithms**

|                                                                                  |                           |                                                               |
|----------------------------------------------------------------------------------|---------------------------|---------------------------------------------------------------|
| <b>Software and Algorithms</b>                                                   |                           |                                                               |
| Fiji/ImageJ                                                                      | (Schindelin et al., 2012) | <a href="https://imagej.net/Fiji">https://imagej.net/Fiji</a> |
| MATLAB, including Image Processing and Statistics and Machine Learning Toolboxes | The Mathworks, Inc.       |                                                               |
| Analysis of Northern blotting and decay rates in MATLAB: display_mRNAShutdown.m  | This paper                |                                                               |

|                                                                                                                                                                                                                                                            |                          |                                                                                     |
|------------------------------------------------------------------------------------------------------------------------------------------------------------------------------------------------------------------------------------------------------------|--------------------------|-------------------------------------------------------------------------------------|
| Gillespie algorithm of RNA production and degradation written in C/CUDA:<br>calculate_metrics.h,<br>cuda_gillespieReduced.h,<br>cuda_randomFuncs.h, file_funcs.h,<br>sample_params.h,<br>cuda_paramSearchSeparate.cu,<br>degradation_confidenceIntervals.m | This paper               |                                                                                     |
| Analysis of FISH images and quantification of RNA in Matlab:<br>FindAndAnalyseFoci.m,<br>DetermineCutoffs.m,<br>DetectCellsAndQuantifyFoci.m                                                                                                               | This paper               |                                                                                     |
| MIJI                                                                                                                                                                                                                                                       |                          | <a href="https://imagej.net/Miji">https://imagej.net/Miji</a>                       |
| CellProfiler,<br>IdentifySecPropagateSubFunction<br>(Matlab compiled function from Cellprofiler 1.0)                                                                                                                                                       | (Carpenter et al., 2006) | <a href="http://www.cellprofiler.org">http://www.cellprofiler.org</a>               |
| Piotr's Matlab Toolbox, nonMaxSupr function                                                                                                                                                                                                                |                          | <a href="https://pdollar.github.io/toolbox/">https://pdollar.github.io/toolbox/</a> |

**Appendix Table S6. Organisms/Strains**

| <b>Experimental Models: Organisms/Strains</b>                                                                                  |                       |
|--------------------------------------------------------------------------------------------------------------------------------|-----------------------|
| <i>S. cerevisiae</i> : Name = BY4741; Genotype = MATa; <i>his3Δ1</i> ; <i>leu2Δ0</i> ; <i>met15Δ0</i> ; <i>ura3Δ0</i>          | Euroscarf             |
| <i>S. cerevisiae</i> : Name = <i>GAL1:ADH1t</i> (high antisense); Genotype = <i>GAL1:ADH1t:HISMX</i>                           | (Murray et al., 2012) |
| <i>S. cerevisiae</i> : Name = TATA mutant (low antisense); Genotype = <i>GAL1:ADH1t</i> (scramble):KANMX                       | (Murray et al., 2015) |
| <i>S. cerevisiae</i> : Name = <i>GAL1:ADH1t</i> (high antisense) <i>set3Δ</i> ; Genotype = <i>GAL1:ADH1t:HISMX SET3::KANMX</i> | This study            |

|                                                                                                                                           |            |
|-------------------------------------------------------------------------------------------------------------------------------------------|------------|
| <i>S. cerevisiae</i> : Name = TATA mutant (low antisense) <i>set3Δ</i> ; Genotype = <i>GAL1:ADH1t</i> (scramble):KANMX <i>SET3::HISMX</i> | This study |
| <i>S. cerevisiae</i> : Name = BY ATP4-GFP;<br>Genotype = <i>ATP4:GFP:HISMX</i>                                                            | This study |
| <i>S. cerevisiae</i> : Name = BY GCV3-GFP;<br>Genotype = <i>GCV3:GFP:HISMX</i>                                                            | This study |
| <i>S. cerevisiae</i> : Name = BY HMS2-GFP;<br>Genotype = <i>HMS2:GFP:HISMX</i>                                                            | This study |
| <i>S. cerevisiae</i> : Name = BY TIM17-GFP;<br>Genotype = <i>TIM17:GFP:HISMX</i>                                                          | This study |
| <i>S. cerevisiae</i> : Name = BY URA4-GFP;<br>Genotype = <i>URA4:GFP:HISMX</i>                                                            | This study |
